# Supplementary material
Source: PubMed Central journal article supplement (PMC3070554)

# Figure Supplementary 1

(A)

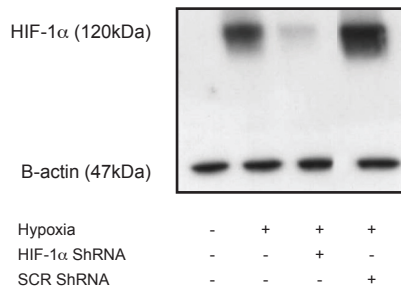

(B)

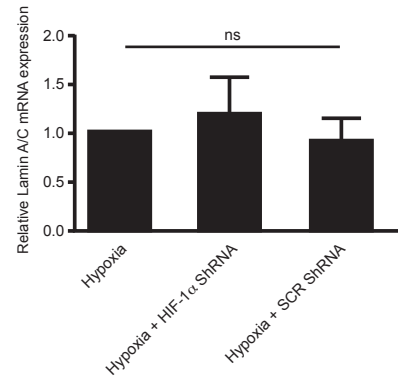

Supplement: mmc1.pdf [file mmc1.pdf]
